# Supplementary material for: High-glucose diets have sex-specific effects on aging in C. elegans: toxic to hermaphrodites but beneficial to males
Source: PubMed Central journal article supplement (PMC4505165; doi:10.18632/aging.100759), 2015-06-08
Supplement: aging-07-0383-s001.pdf [file aging-07-0383-s001.pdf]

## SUPPLEMENTARY TABLE

**Table S1. Lifespans shown in Figures 1A and 1B.  
20°C**

| Sex           | Diet    | Median lifespan (days) | Maximum lifespan (days) | No. animals | Median lifespan change | Maximum lifespan change | <i>P</i> value against control | No. of Exp. | Figure |
|---------------|---------|------------------------|-------------------------|-------------|------------------------|-------------------------|--------------------------------|-------------|--------|
| Hermaphrodite | Control | 17                     | 36                      | 128/151     | N/A                    | N/A                     | N/A                            | 3           | 1A     |
|               | Glucose | 11                     | 22                      | 149/151     | -35%                   | -39%                    | < 0.0001                       | 3           | 1A     |
| Male          | Control | 17                     | 36                      | 353/369     | N/A                    | N/A                     | N/A                            | 8           | 1B     |
|               | Glucose | 19                     | 36                      | 320/371     | +10%                   | 0%                      | < 0.0001                       | 8           | 1B     |

Data shown are a composite of 3 or 8 individual experiments, which are described individually below. Synchronized late L4 adults were transferred to lifespan plates (control NGM or NGM plus 250 mM glucose). *P* values were obtained by log-rank. Median and maximum lifespan were shorter on glucose compared to control in hermaphrodites. Median lifespan was longer, and maximum lifespan unchanged, on glucose compared to control in males.

| Sex           | Diet    | Median lifespan (days) | Maximum lifespan (days) | No. animals | Median lifespan change | Maximum lifespan change | <i>P</i> value against Control | Assay # |
|---------------|---------|------------------------|-------------------------|-------------|------------------------|-------------------------|--------------------------------|---------|
| Hermaphrodite | Control | 17                     | 31                      | 51/51       | N/A                    | N/A                     | N/A                            | 1       |
|               | Glucose | 8                      | 21                      | 51/51       | -53%                   | -32%                    | < 0.0001                       | 1       |
|               | Control | 17                     | 25                      | 35/50       | N/A                    | N/A                     | N/A                            | 2       |
|               | Glucose | 12                     | 20                      | 48/50       | -29%                   | -20%                    | < 0.0001                       | 2       |
|               | Control | 16                     | 36                      | 42/50       | N/A                    | N/A                     | N/A                            | 3       |
|               | Glucose | 12                     | 22                      | 50/50       | -25%                   | -39%                    | < 0.0001                       | 3       |
| Male          | Control | 17                     | 33                      | 50/50       | N/A                    | N/A                     | N/A                            | 1       |
|               | Glucose | 18                     | 29                      | 47/50       | +6%                    | -12%                    | 0.8                            | 1       |
|               | Control | 11                     | 36                      | 45/50       | N/A                    | N/A                     | N/A                            | 2       |
|               | Glucose | 17                     | 31                      | 47/50       | +55%                   | -14%                    | 0.2                            | 2       |
|               | Control | 18                     | 31                      | 49/50       | N/A                    | N/A                     | N/A                            | 3       |
|               | Glucose | 16                     | 29                      | 46/51       | -11%                   | -6%                     | 0.7                            | 3       |
|               | Control | 17                     | 23                      | 19/20       | N/A                    | N/A                     | N/A                            | 4       |
|               | Glucose | 20                     | 23                      | 20/20       | +18%                   | 0%                      | 0.09                           | 4       |
|               | Control | 15                     | 28                      | 49/50       | N/A                    | N/A                     | N/A                            | 5       |
|               | Glucose | 21                     | 28                      | 42/50       | +40%                   | 0%                      | <0.002                         | 5       |
|               | Control | 21                     | 34                      | 47/50       | N/A                    | N/A                     | N/A                            | 6       |
|               | Glucose | 22                     | 34                      | 39/50       | +5%                    | 0%                      | 0.9                            | 6       |
|               | Control | 13                     | 25                      | 45/50       | N/A                    | N/A                     | N/A                            | 7       |
|               | Glucose | 20.5                   | 36                      | 30/50       | +58%                   | +36%                    | <0.0001                        | 7       |
|               | Control | 16                     | 23                      | 49/49       | N/A                    | N/A                     | N/A                            | 8       |
|               | Glucose | 16                     | 27                      | 49/50       | 0%                     | +17%                    | <0.02                          | 8       |

Assay numbers indicate trials that were performed in parallel. For hermaphrodites, median lifespan on high-glucose diet was shorter than median lifespan on control diet in each trial (3/3), and maximum lifespan was shorter on glucose compared to control for each trial (3/3). For males, median lifespan on high-glucose diet was longer than (6/8) or equal to (1/8) median lifespan on control diet in all but one trial. High-glucose diet had no overall effect on maximum lifespan in males: in some trials maximum lifespan was equal (3/8), and in others it was longer (2/8) or shorter (3/8) on glucose compared to control.
